# Supplementary material for: From resistance to persistence: Insights of a mathematical model on the indiscriminate use of insecticide
Source: PubMed Central journal article supplement (PMC7723293; doi:10.1371/journal.pntd.0008862), 2020-11-18
Supplement: pntd.0008862.s001.pdf [file pntd.0008862.s001.pdf]

# From Resistance to Persistence: Insights of a Mathematical Model on the Indiscriminate Use of Insecticide

Helio Schechtman, Denise Valle, Max Souza

## Supporting Information

### 1 Initial conditions

The initial condition for the simulation is obtained by redistributing a purely susceptible population — see the SI in [1] — into the three genotypes. This distribution is done according to the Hardy-Weinberg proportions of 2% for the R allele and 98% for the S allele to generate the mainly susceptible population described in the main text.

| Stage      | SS               | SR               | RR               |
|------------|------------------|------------------|------------------|
| EGG        | 469300000*0.9604 | 469300000*0.0392 | 469300000*0.0004 |
| LARVA      | 2101800*0.9604   | 2101800*0.0392   | 2101800*0.0004   |
| PUPA       | 343790*0.9604    | 343790*0.0392    | 343790*0.0004    |
| NON-PAROUS | 934610*0.9604    | 934610*0.0392    | 934610*0.0004    |
| PAROUS     | 2823400*0.9604   | 2823400*0.0392   | 2823400.*0.0004  |

**Table 1.** Distribution of a mainly susceptible population

### Computational implementation

The model described above was implemented in Octave version 4.2.2 using the Lsode routine for integration.

### References

1. Schechtman H, Souza MO. Costly Inheritance and the Persistence of Insecticide Resistance in *Aedes aegypti* Populations. PLoS ONE. 2015;10(5):e0123961. doi:10.1371/journal.pone.0123961.
